# Supplementary material
Source: PubMed Central journal article supplement (PMC7364848)
Supplement: ntz071_suppl_supplementary_figure_1.pdf [file ntz071_suppl_supplementary_figure_1.pdf]

## Funnel Plot of Standard Error by Hedges's g

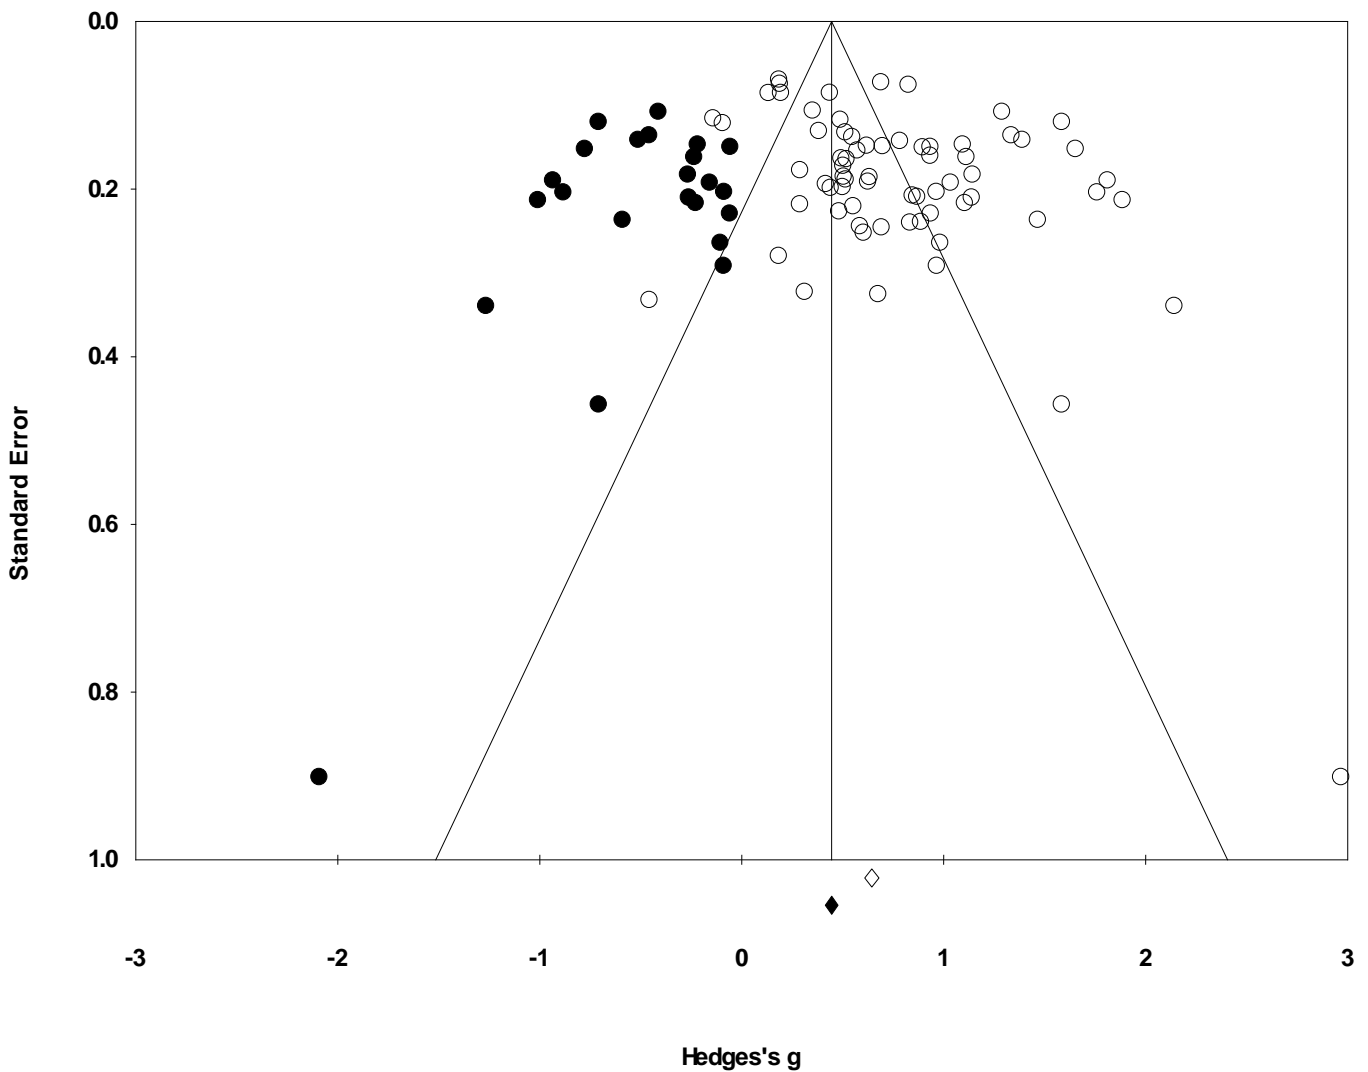

*Supplementary Figure 1.* Funnel plot illustrating possible publication bias in the overall meta-analysis. Studies with lower standard errors (i.e., those with higher power) are plotted towards the top of the figure. Open circles represent observed studies included in the omnibus analysis, filled circles indicate imputed studies needed to create symmetrical distribution of expected effects. The open diamond represents the observed overall effect size in the omnibus meta-analysis, filled diamond represents effect size adjusted for inclusion of imputed studies (filled circles).
