# Supplementary material
Source: PubMed Central journal article supplement (PMC7364848)
Supplement: ntz071_suppl_supplementary_table_1.pdf [file ntz071_suppl_supplementary_table_1.pdf]

Supplementary Table 1  
*Study Characteristics*

| Citation                    | n   | Percent Male | Mean Age | Mean Cigs/Day | Mean FTND | Mean Years Smoking | Hours Abstinent | Craving Measure | Cue Mode | Comparison |
|-----------------------------|-----|--------------|----------|---------------|-----------|--------------------|-----------------|-----------------|----------|------------|
| Attwood et al. (2008)       | 54  | 56%          | 22.0     | 11.0          | 4.0       | 6.0                | 12              | QSU-10          | I        | BL         |
| Bidwell et al. (2013)       | 47  | 38%          | 16.4     | 9.3           | —         | 2.1                | 16              | QSU-10          | IV       | N          |
| Bidwell et al. (2013)       | 27  | 41%          | 16.2     | 9.5           | —         | 1.9                | 0               | QSU-10          | IV       | N          |
| Brandon et al. (2011)       | 100 | 61%          | 43.3     | 24.6          | 5.8       | 25.1               | 12              | SI              | I        | N          |
| Burton & Tiffany (1997)     | 60  | 50%          | 30.7     | 26.3          | —         | 5.9                | 0               | QSU-10          | IV       | N          |
| Carpenter et al. (2009)     | 78  | 60%          | 29.0     | 19.3          | 4.8       | 11.1               | 1               | QSU-10          | IV       | N          |
| Cepeda-Benito et al. (1996) | 36  | 50%          | 33.5     | 27.9          | —         | 21.8               | 0               | QSU-10          | SI       | N          |
| Cepeda-Benito et al. (1996) | 40  | 50%          | 29.1     | 27.0          | —         | 17.5               | 1               | QSU-10          | SI       | N          |
| Chiuccariello et al. (2013) | 18  | 44%          | 37.4     | 18.2          | 6.2       | 21.6               | 1               | QSU-10          | I        | N          |
| Conklin & Tiffany (2001)    | 60  | 50%          | 35.0     | 28.9          | —         | 22.5               | 0               | QSU-10          | SI       | N          |
| Conklin et al. (2013)       | 72  | 50%          | 34.4     | 20.2          | 5.3       | 19.0               | 6               | QSU-4           | I        | N          |
| Conklin et al. (2013)       | 72  | 50%          | 34.4     | 20.2          | 5.3       | 19.0               | 6               | QSU-4           | I        | N          |
| Conklin et al. (2015)       | 60  | 50%          | 36.9     | 19.7          | 5.7       | 10.2               | 0               | QSU-4           | I        | N          |
| Conklin et al. (2010)       | 72  | 50%          | 28.9     | 20.7          | 5.7       | 15.5               | 6               | QSU-4           | I        | N          |

|                           |     |     |      |      |     |      |    |        |    |    |
|---------------------------|-----|-----|------|------|-----|------|----|--------|----|----|
| Conklin et al. (2008)     | 62  | 50% | 34.4 | 20.0 | 6.1 | 19.5 | 6  | QSU-4  | I  | N  |
| Conklin et al. (2008)     | 16  | —   | 30.1 | 21.1 | 4.6 | 14.1 | 6  | QSU-4  | I  | N  |
| Conklin et al. (2008)     | 62  | 50% | 34.4 | 20.0 | 6.1 | 19.5 | 6  | QSU-4  | I  | N  |
| David et al. (2007)       | 8   | 0%  | 55.0 | 17.9 | 6.5 | 38.0 | 12 | S-J    | I  | BL |
| David et al. (2007)       | 8   | 0%  | 55.0 | 17.9 | 6.5 | 38.0 | 0  | S-J    | I  | BL |
| Dawkins et al. (2006)     | 145 | 43% | 31.8 | 18.1 | 4.9 | 15.5 | 12 | SI     | IV | BL |
| Doran et al. (2007)       | 60  | 50% | 30.8 | 19.1 | 5.4 | 18.1 | 0  | QSU-10 | IV | N  |
| Elash et al. (1995)       | 36  | 50% | 20.4 | 26.3 | —   | 4.4  | 6  | QSU-10 | SI | N  |
| Erblich & Bovbjerg (2004) | 225 | 42% | 38.9 | 20.1 | 6.0 | 19.4 | 0  | CCQ    | IV | BL |
| Erblich & Bovbjerg (2004) | 225 | 42% | 38.9 | 20.1 | 6.0 | 19.4 | 0  | CCQ    | SI | BL |
| Erblich et al. (2012)     | 153 | 52% | 37.6 | 17.1 | 5.3 | 17.9 | 0  | CCQ    | IV | N  |
| Erblich et al. (2012)     | 153 | 52% | 37.6 | 17.1 | 5.3 | 17.9 | 0  | CCQ    | SI | N  |
| Field & Duka (2004)       | 33  | 39% | 21.5 | 14.4 | —   | 5.4  | —  | QSU-10 | IV | N  |
| Gass & Tiffany (2017)     | 30  | 50% | 36.8 | 18.9 | —   | 20.0 | 1  | CCQ    | IV | N  |
| Germeroth et al. (2015)   | 30  | —   | 28.2 | 14.0 | —   | 13.9 | —  | QSU-4  | IV | N  |
| Heishman et al. (2010)    | 30  | 50% | 34.1 | 21.9 | 5.7 | 12.4 | 12 | SI     | SI | N  |

|                             |     |      |      |      |     |      |     |        |    |    |
|-----------------------------|-----|------|------|------|-----|------|-----|--------|----|----|
| Hutchison et al. (1999)     | 26  | 54%  | 32   | 20.6 | —   | 13.8 | 12  | CCQ    | SI | BL |
| Hutchison et al. (1999)     | 26  | 54%  | 32   | 20.6 | —   | 13.8 | 0   | CCQ    | SI | N  |
| Juliano et al. (1998)       | 132 | 65%  | 33.1 | 27.3 | —   | 16.8 | 3   | SI     | IV | N  |
| Kang et al. (2013)          | 13  | 100% | 24.8 | 17.5 | 5.6 | 5.7  | 36  | SI     | I  | N  |
| LaRowe et al. (2007)        | 19  | 100% | 30.1 | 19.4 | —   | 11.7 | 1   | QSU-10 | IV | N  |
| Li et al. (2017)            | 11  | 40%  | 39.7 | 17.3 | 5.2 | 22.8 | 2   | QSU-10 | I  | N  |
| Littel & Franken (2011)     | 27  | 33%  | 23.3 | 15.1 | 3.8 | 7.1  | 1   | QSU-10 | I  | BL |
| Littel & Franken (2011)     | 22  | 46%  | 21.0 | 2.31 | 0.2 | 5.1  | 1   | QSU-10 | I  | BL |
| Littel & Franken (2011)     | 28  | 40%  | 21.7 | 14.2 | 3.4 | 5.7  | 1   | QSU-10 | I  | BL |
| Litvin & Brandon (2010)     | 175 | 52%  | 39.3 | 22.3 | 5.6 | 21.3 | 0.5 | SI     | IV | N  |
| Lochbuehler et al. (2009)   | 65  | 34%  | 22.7 | 9.6  | —   | 8.9  | 6   | QSU-4  | V  | N  |
| Lochbuehler et al. (2009)   | 31  | 39%  | 24.0 | 9.6  | —   | 9.3  | 6   | QSU-4  | I  | N  |
| Lopez et al. (2008)         | 62  | 0%   | 20.0 | 15.7 | 3.3 | 4.6  | 0   | SI     | I  | N  |
| Maude-Griffin et al. (1996) | 100 | 51%  | 22.6 | 24.5 | —   | 6.3  | 0   | QSU-10 | SI | N  |
| McClernon et al. (2009)     | 17  | 39%  | 28.6 | 17.8 | 4.4 | 11.6 | —   | SI     | I  | N  |
| Miranda et al. (2008)       | 20  | 85%  | 50.4 | 24.0 | 5.2 | 23.0 | —   | SI     | IV | N  |

|                             |     |      |      |       |     |      |      |        |    |    |
|-----------------------------|-----|------|------|-------|-----|------|------|--------|----|----|
| Morissette et al. (2012)    | 96  | 60%  | 39.4 | 19.1  | 3.9 | 13.6 | 5    | QSU-10 | SI | BL |
| Paris et al. (2011)         | 23  | 63%  | 33.1 | 18.6  | —   | 17.4 | 0    | SI     | VR | N  |
| Rohsenow et al. (2007)      | 134 | 54%  | 47.1 | 27.3  | 6.5 | 30.3 | 10   | QSU-10 | IV | N  |
| Sayette & Hufford (1994)    | 40  | 30%  | 21.1 | 15.8  | —   | 4.7  | 12   | SI     | IV | N  |
| Sayette & Hufford (1994)    | 40  | 30%  | 21.1 | 15.8  | —   | 4.7  | 0    | SI     | IV | N  |
| Sayette & Hufford (1994)    | 31  | 55%  | 21.5 | 17.2  | —   | 6    | 12   | SI     | IV | N  |
| Sayette & Hufford (1994)    | 31  | 55%  | 21.5 | 17.2  | —   | 6    | 0    | SI     | IV | N  |
| Sayette & Parrott (1999)    | 58  | 52%  | 22.7 | 18.4  | —   | 5.6  | 6    | SI     | IV | BL |
| Sayette et al. (2001)       | 34  | 56%  | 25.2 | 24.9  | —   | 9.4  | 7    | SI     | IV | N  |
| Sayette et al. (2001)       | 33  | —    | 25.4 | 24.8  | —   | 8.3  | 0    | SI     | IV | N  |
| Shiffman et al. (2013)      | 201 | 57%  | 41.0 | 16.0  | —   | 26.0 | 0.5  | QSU-F1 | I  | N  |
| Singleton et al. (2003)     | 48  | 50%  | 33.5 | 22.9  | 6.0 | 14.5 | 0    | SI     | SI | N  |
| Smolka et al. (2006)        | 10  | 100% | 32.0 | 16.0  | 3.0 | 10.0 | 0    | SI     | I  | N  |
| Stevenson et al. (2017)     | 22  | 59%  | 38.0 | 11.8  | 4.0 | 18.1 | 6    | QSU-4  | I  | N  |
| Thompson-Lake et al. (2014) | 36  | 61%  | —    | 18.3  | 6.0 | 23.6 | 26.9 | QSU-10 | VR | N  |
| Tiffany & Drobos (1990)     | 60  | 62%  | 20.5 | 15.89 | —   | 3.5  | 0    | SI     | SI | N  |

|                             |    |     |      |      |     |      |     |        |    |   |
|-----------------------------|----|-----|------|------|-----|------|-----|--------|----|---|
| Tong et al.<br>(2007)       | 20 | 50% | 37.7 | 17.5 | 4.7 | 18.5 | 0   | SI     | V  | N |
| Traylor et al.<br>(2008)    | 20 | 60% | 20.9 | 13.4 | —   | 6.0  | —   | QSU-10 | VR | N |
| Watson et al.<br>(2010)     | 90 | 59% | 30.0 | 19.3 | 4.9 | 11.3 | 0   | QSU-10 | IV | N |
| Weinberger et al.<br>(2012) | 52 | 58% | 44.8 | 7.4  | 6.2 | 28.4 | 0   | SI     | IV | N |
| Wesbrook et al.<br>(2011)   | 54 | 69% | 45.0 | 17.6 | 5.0 | 25.8 | 12  | SI     | I  | N |
| Yalachkov et al.<br>(2013)  | 10 | 60% | 31.0 | 14.8 | 3.8 | 12.6 | 0.5 | SI     | IV | N |

*Note.* FTND = Fagerstrom Test for Nicotine Dependence; — = not reported; CCQ = cigarette craving questionnaire; QSU = Questionnaire on Smoking Urges; SI = single item; S-J = Shiffman-Jarvik Craving Scale; I = images; IV = *in vivo*; SI = scripted imagery; V = video; VR = virtual reality; BL = baseline; N = neutral.
