# Supplementary material
Source: PubMed Central journal article supplement (PMC7364848)
Supplement: ntz071_suppl_supplementary_table_2.pdf [file ntz071_suppl_supplementary_table_2.pdf]

Supplementary Table 2

*Outcomes organized by methodologically relevant variables*

|                                 | Q       | k  | Hedge's <i>g</i> | SE   | 95% CI |      |
|---------------------------------|---------|----|------------------|------|--------|------|
|                                 |         |    |                  |      | LL     | UL   |
| <b>Comparison</b>               | 0.04    |    |                  |      |        |      |
| Neutral cue                     |         | 55 | 0.77***          | 0.07 | 0.64   | 0.91 |
| Baseline                        |         | 13 | 0.75***          | 0.14 | 0.48   | 1.02 |
| <b>Cue Presentation Order</b>   | 0.16    |    |                  |      |        |      |
| Other                           |         | 37 | 0.82***          | 0.09 | 0.65   | 0.99 |
| Fixed                           |         | 14 | 0.75***          | 0.14 | 0.48   | 1.03 |
| <b>Craving Measure</b>          | 9.27    |    |                  |      |        |      |
| Single item                     |         | 24 | 0.69***          | 0.10 | 0.50   | 0.88 |
| QSU-10                          |         | 23 | 0.87***          | 0.10 | 0.68   | 1.07 |
| QSU-4                           |         | 11 | 0.76***          | 0.14 | 0.48   | 1.04 |
| Cigarette Craving Questionnaire |         | 7  | 0.96***          | 0.18 | 0.62   | 1.31 |
| Shiffman-Jarvik                 |         | 2  | -0.06            | 0.39 | -0.82  | 0.70 |
| QSU Factor 1                    |         | 1  | 0.19             | 0.44 | -0.68  | 1.06 |
| <b>Abstinence Requirement</b>   | 5.29*   |    |                  |      |        |      |
| Any abstinence                  |         | 40 | 0.66***          | 0.07 | 0.52   | 0.80 |
| No abstinence                   |         | 28 | 0.92***          | 0.09 | 0.75   | 1.09 |
| <b>Cue Presentation Mode</b>    | 15.25** |    |                  |      |        |      |
| <i>In vivo</i>                  |         | 26 | 0.62***          | 0.09 | 0.46   | 0.79 |
| Images                          |         | 24 | 0.80***          | 0.10 | 0.61   | 0.98 |
| Scripted imagery                |         | 13 | 1.11***          | 0.12 | 0.87   | 1.35 |
| Virtual reality                 |         | 3  | 0.78**           | 0.27 | 0.25   | 1.31 |
| Video                           |         | 2  | 0.09             | 0.31 | -0.53  | 0.70 |

*Note.* Q = Cochran's *Q*; k = number of studies; SE= standard error; CI = confidence interval; LL = lower limit; UL = upper limit.

\**p* < .05, \*\**p* < .01, \*\*\**p* < .001
